# Supplementary material for: Cathode/gel polymer electrolyte integration design based on continuous composition and preparation technique for high performance lithium ion batteries
Source: Royal Society of Chemistry journal article supplement (doi:10.1039/d0ra10743c), 2021-01-01
Supplement: d0ra10743c1.pdf [file d0ra10743c1.pdf]

## **Cathode/Gel polymer electrolyte integration design based on continuous composition and preparation technic for high performance lithium ion battery**

Feng Yu,<sup>a,b\*</sup> Lingzhu Zhao,<sup>a</sup> Zhang hongbing,<sup>a</sup> Zhipeng Sun,<sup>a</sup> Yuli Li,<sup>c</sup> Qing Hu,<sup>d</sup> Yong Chen<sup>\*a</sup>

*<sup>a</sup> State Key Laboratory of Marine Resource Utilization in South China Sea, Hainan Provincial Key Laboratory of Research on Utilization of Si-Zr-Ti Resources, College of Materials Science and Engineering, Hainan University, 570228, PR China*

*<sup>b</sup> Key Laboratory of Advanced Energy Materials Chemistry (Ministry of Education), College of Chemistry, Nankai University, Tianjin, 300071, PR China*

*<sup>c</sup> Institution of Plastic Surgery, Weifang Medical University, Weifang 261042, P. R. China*

*<sup>d</sup>School of Material Science and Engineering, Jingdezhen Ceramic Institute, Jingdezhen 333001, P. R. China*

*E-mail: [yuf@hainanu.edu.cn](mailto:yuf@hainanu.edu.cn); [ychen2002@163.com](mailto:ychen2002@163.com)*

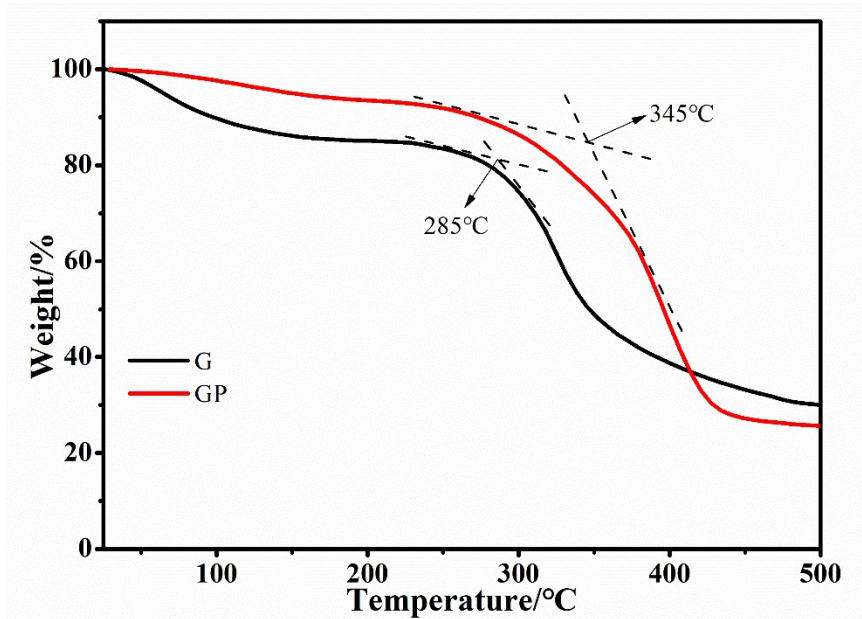

Figure S1. TGA of gelatin (G) and crosslinked GelMA/PEGDA (GP) in nitrogen from 35 to 500 °C.

Table S1. Ionic conductivity of GPE dependence on temperature.

| Temperature/°C                           | 15   | 25   | 35   | 45   | 55   | 65   | 75   | 85   |
|------------------------------------------|------|------|------|------|------|------|------|------|
| $\delta \times 10^{-3}/\text{S cm}^{-1}$ | 1.93 | 2.32 | 2.95 | 3.35 | 3.68 | 4.22 | 4.83 | 5.63 |

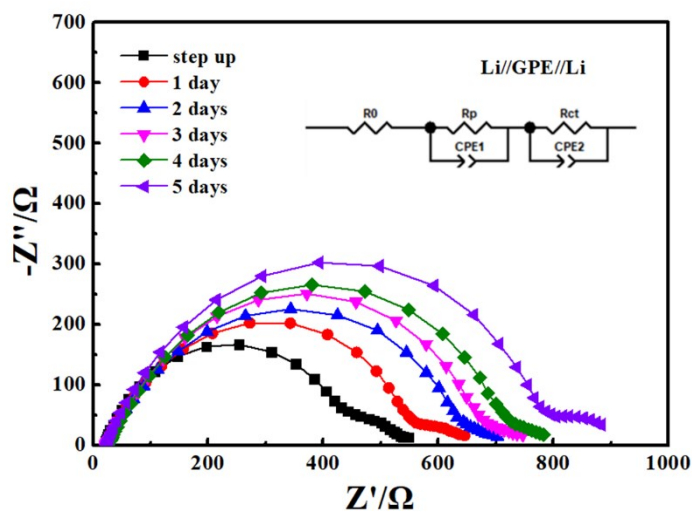

Figure S2. Nyquist plots of Li/GPE/Li cells with GelMA/PEGDA GPE.

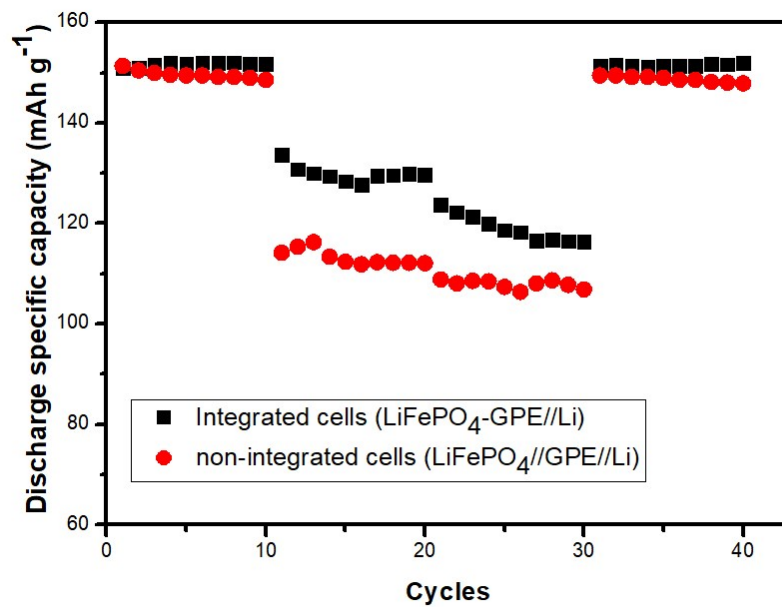

Figure S3. The rate behavior of non-integrated cells and integrated cells at 0.2C, 0.5C and 1C.
